# Supplementary material for: Derivatives (halogen, nitro and amino) of 8-hydroxyquinoline with highly potent antimicrobial and antioxidant activities
Source: PubMed Central journal article supplement — Biochem Biophys Rep. 2016 Mar 24;6:135–41. doi: 10.1016/j.bbrep.2016.03.014 (PMC5689172; doi:10.1016/j.bbrep.2016.03.014), 2016-03-24
Supplement: mmc1.pdf [file mmc1.pdf]

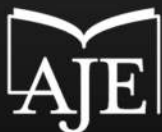

# EDITORIAL CERTIFICATE

This document certifies that the manuscript listed below was edited for proper English language, grammar, punctuation, spelling, and overall style by one or more of the highly qualified native English speaking editors at American Journal Experts.

## Manuscript title:

Derivatives (halogen, nitro and amino) of 8-hydroxyquinoline with highly potent antimicrobial and antioxidant activities

## Authors:

Rungrot Cherdtrakulkiat, Somchai Boonpangrak, Nujarin Sinthupoom, Supaluk Prachayasittikul, Somsak Ruchirawat, Virapong Prachayasittikul

## Date Issued:

February 22, 2016

## Certificate Verification Key:

0A98-1690-A20D-60BF-C74E

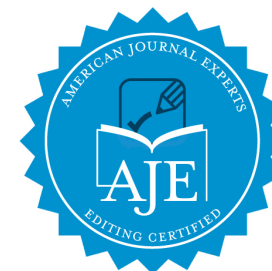

This certificate may be verified at [www.aje.com/certificate](http://www.aje.com/certificate). This document certifies that the manuscript listed above was edited for proper English language, grammar, punctuation, spelling, and overall style by one or more of the highly qualified native English speaking editors at American Journal Experts. Neither the research content nor the authors' intentions were altered in any way during the editing process. Documents receiving this certification should be English-ready for publication; however, the author has the ability to accept or reject our suggestions and changes. To verify the final AJE edited version, please visit our verification page. If you have any questions or concerns about this edited document, please contact American Journal Experts at [support@aje.com](mailto:support@aje.com).
